# Supplementary material for: Synthesis, Antifungal Evaluation and In Silico Study of N-(4-Halobenzyl)amides
Source: PubMed Central journal article supplement (PMC6273175; doi:10.3390/molecules21121716), 2016-12-13
Supplement: molecules-21-01716-s001.pdf [file molecules-21-01716-s001.pdf]

# Supplementary Material: Synthesis, Antifungal Evaluation and *In Silico* Study of *N*-(4-Halobenzyl)amides

Ricardo Carneiro Montes, Ana Luiza A. L.Perez, Cássio Ilan S. Medeiros, Marianna Oliveira de Araújo, Edeltrudes de Oliveira Lima, Marcus Tullius Scotti and Damiano Pergentino de Sousa

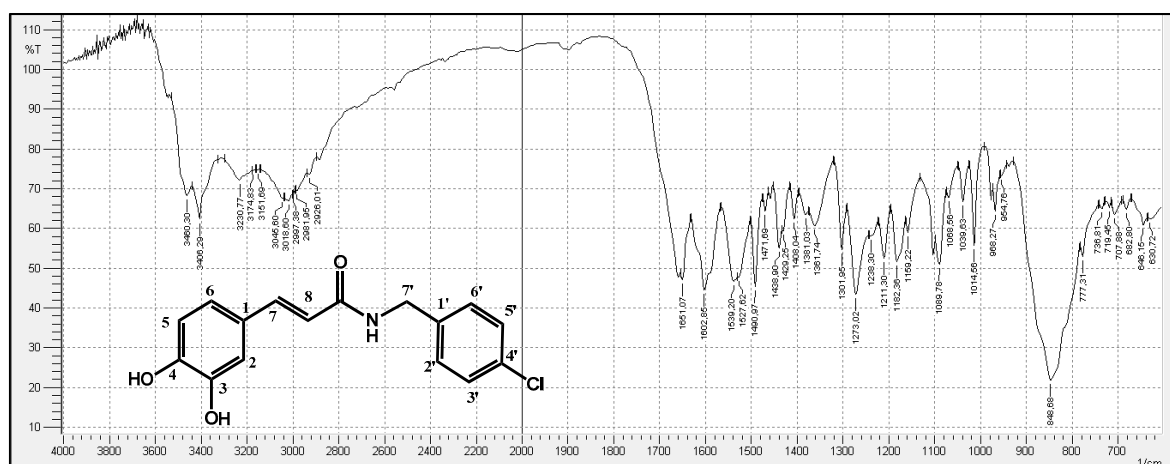

Figure S1. Infrared spectrum (KBr,  $\text{cm}^{-1}$ ) of (*E*)-*N*-(4-chlorobenzyl)-3-(3,4-dihydroxyphenyl)acrylamide (2).

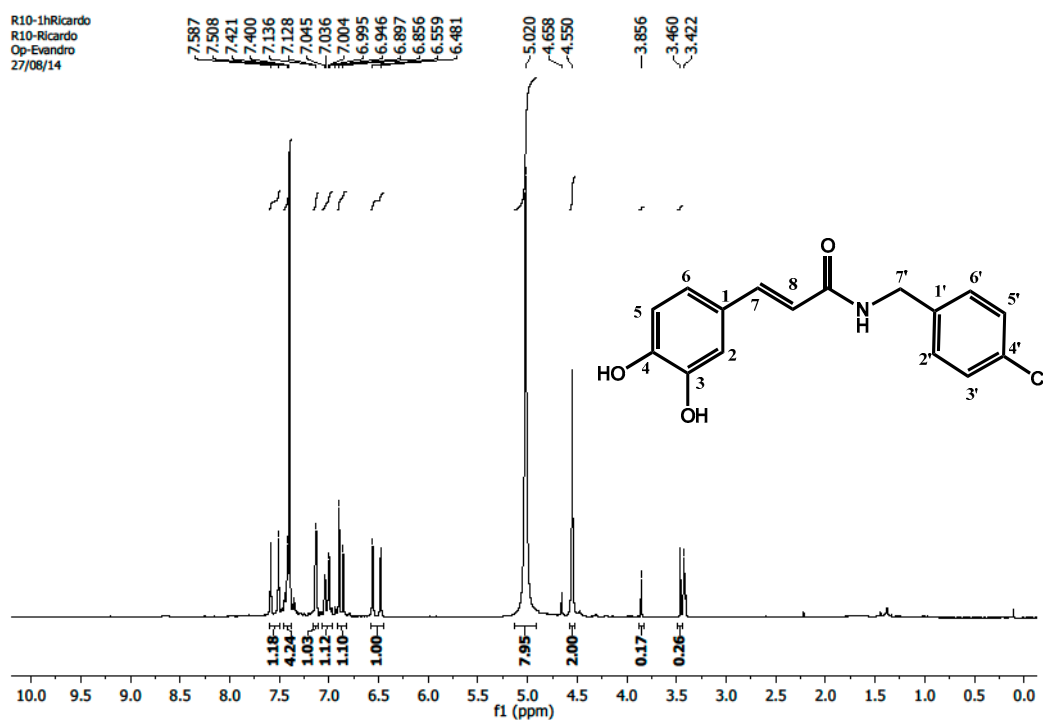

Figure S2.  $^1\text{H-NMR}$  spectrum of (*E*)-*N*-(4-chlorobenzyl)-3-(3,4-dihydroxyphenyl)acrylamide (MeOD, 200 MHz).

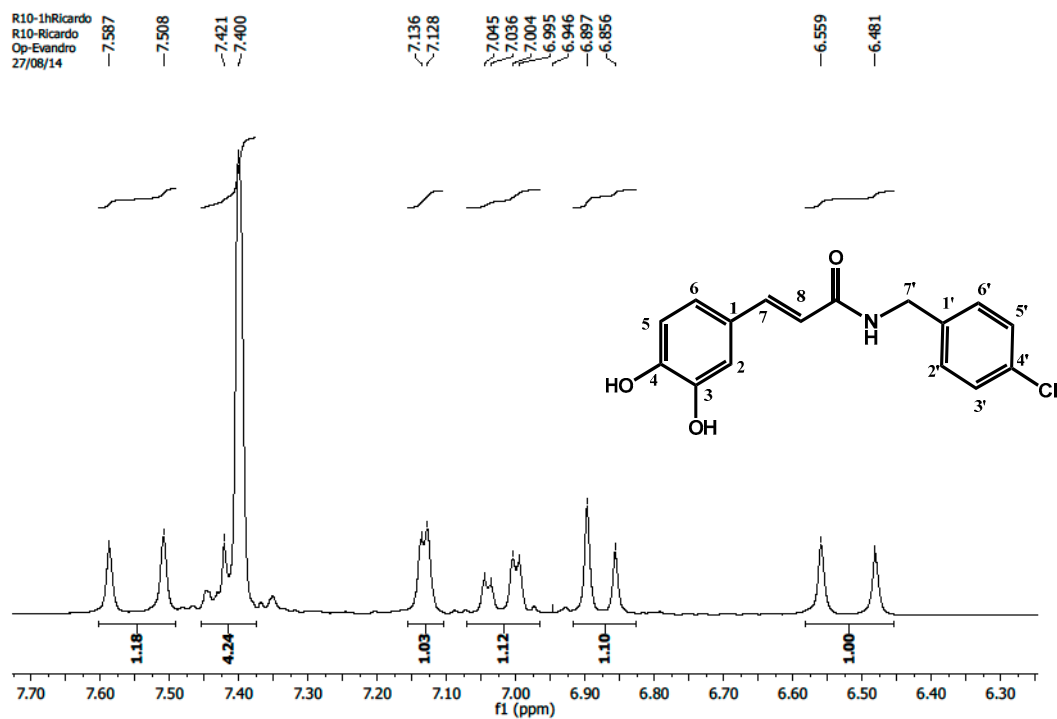

**Figure S3.** Expansion of the  $^1\text{H}$ -NMR spectrum of (*E*)-*N*-(4-chlorobenzyl)-3-(3,4-dihydroxyphenyl)acrylamide (2) (MeOD, 200 MHz).

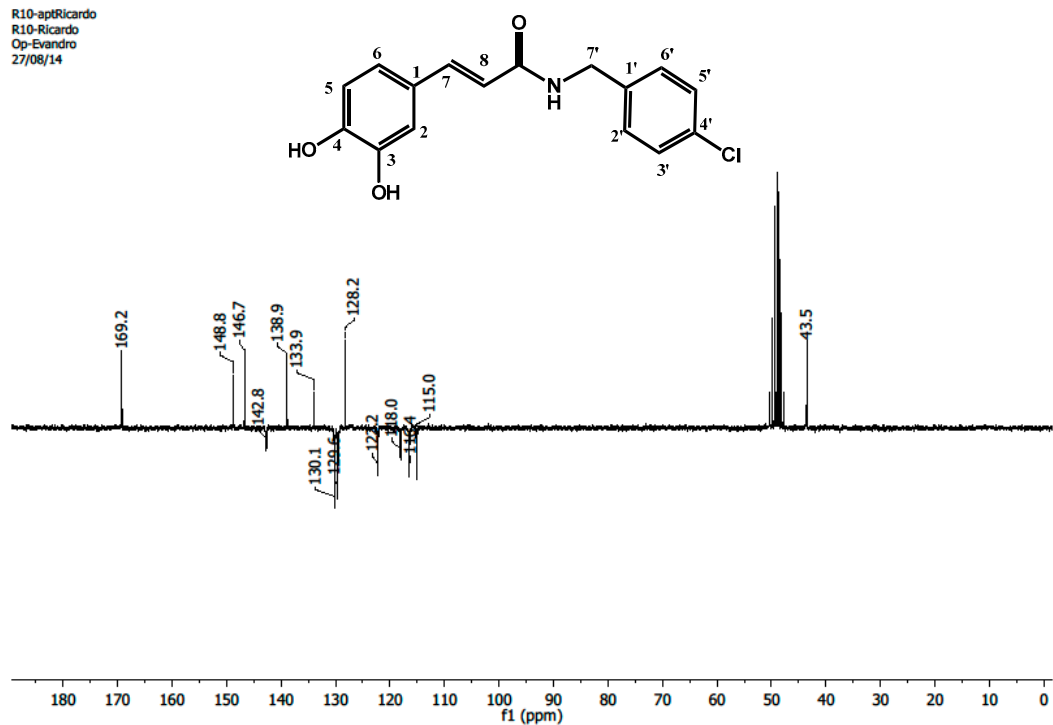

**Figure S4.**  $^{13}\text{C}$ -APT NMR spectrum of (*E*)-*N*-(4-chlorobenzyl)-3-(3,4-dihydroxyphenyl)acrylamide (2) (MeOD, 50 MHz).

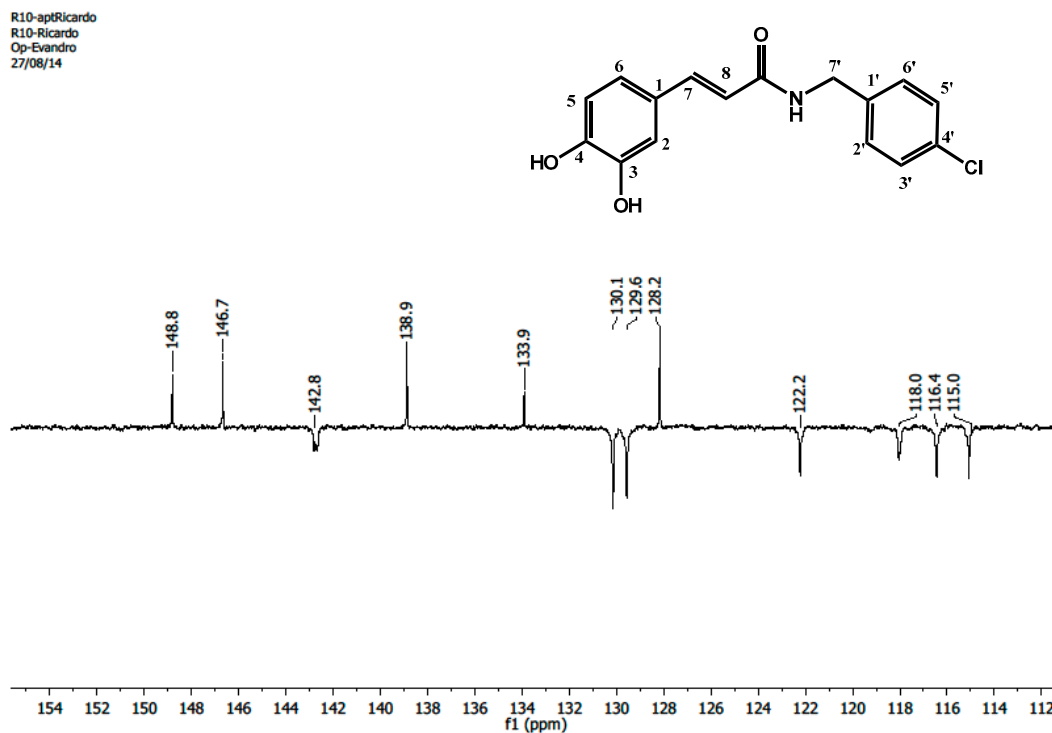

**Figure S5.** Expansion of the  $^{13}\text{C}$ -APT NMR spectrum of *(E)*-*N*-(4-chlorobenzyl)-3-(3,4-dihydroxyphenyl)acrylamide (2) (MeOD, 50 MHz).

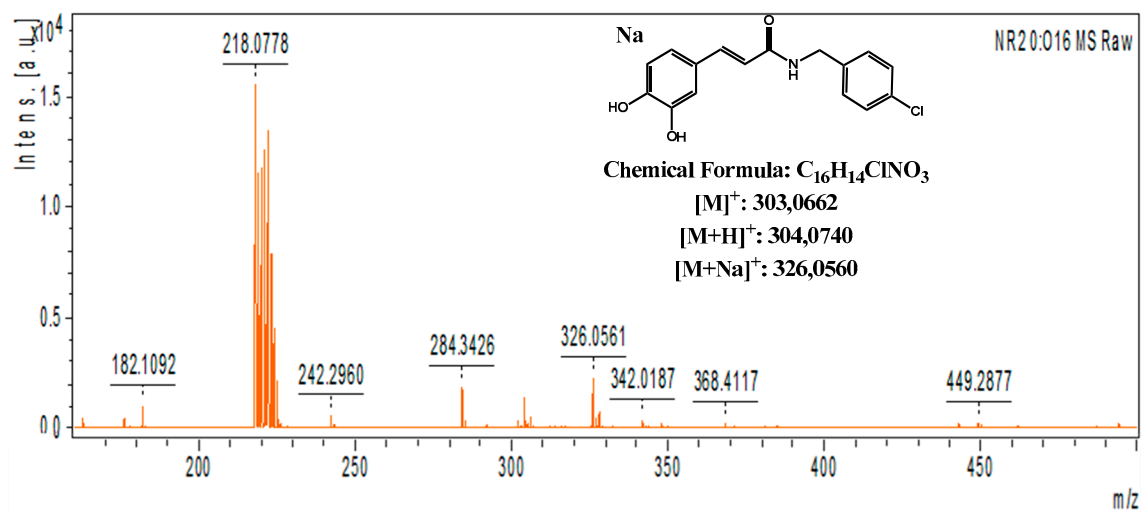

**Figure S6.** High resolution mass spectrum—MALDI of *(E)*-*N*-(4-chlorobenzyl)-3-(3,4-dihydroxyphenyl)acrylamide (2).

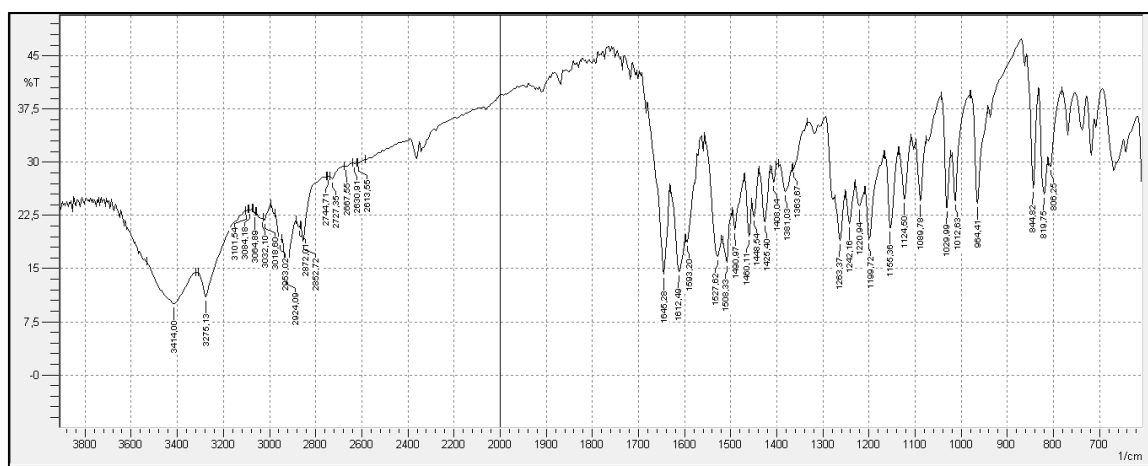

**Figure S7.** Infrared spectrum (KBr,  $\text{cm}^{-1}$ ) of (*E*)-*N*-(4-chlorobenzyl)-3-(4-hydroxy-3-methoxyphenyl)acrylamide (3).

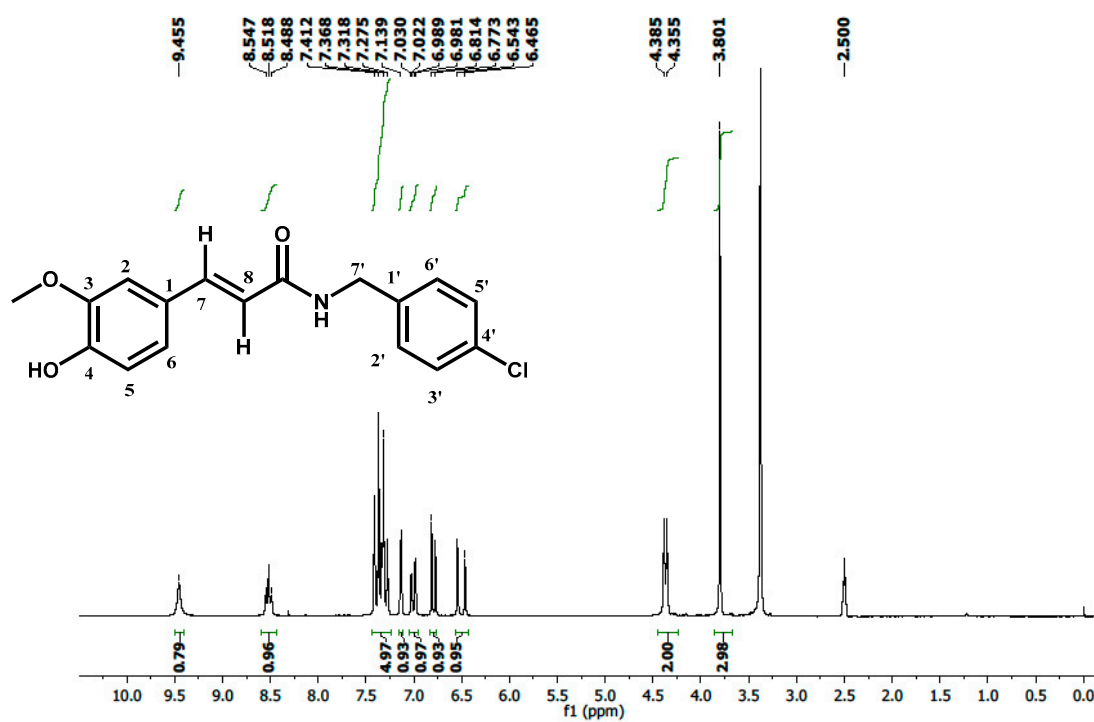

**Figure S8.**  $^1\text{H-NMR}$  spectrum of (*E*)-*N*-(4-chlorobenzyl)-3-(4-hydroxy-3-methoxyphenyl)acrylamide (3) ( $\text{DMSO-}d_6$ , 200 MHz).

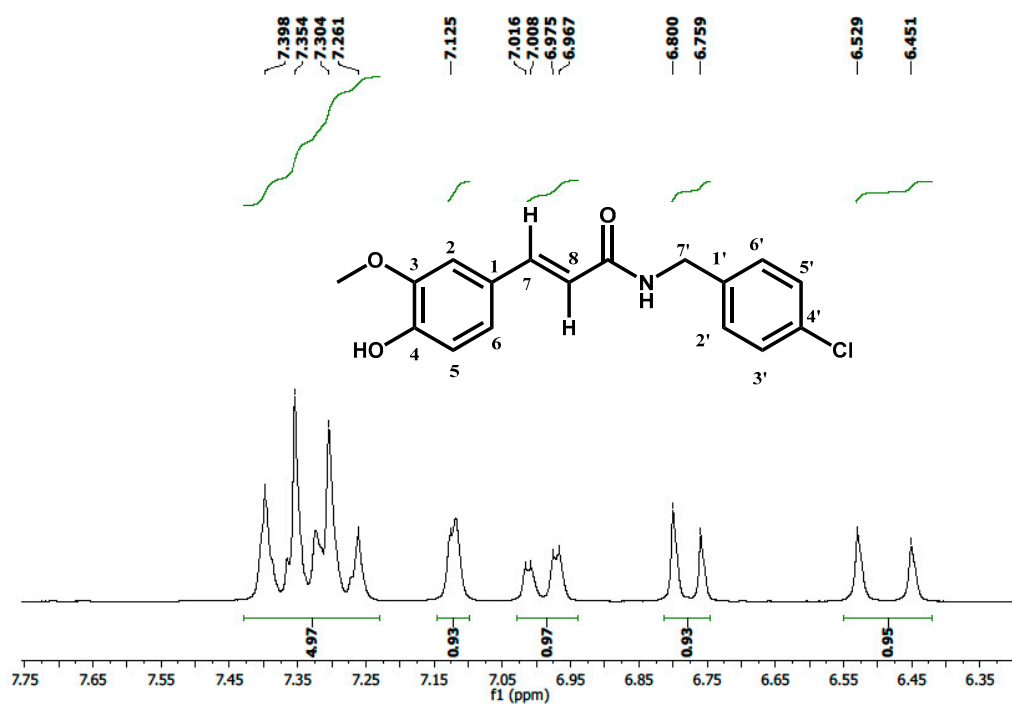

**Figure S9.** Expansion of the  $^1\text{H-NMR}$  spectrum of *(E)*-*N*-(4-chlorobenzyl)-3-(4-hydroxy-3-methoxyphenyl)acrylamide (3) ( $\text{DMSO-}d_6$ , 200 MHz).

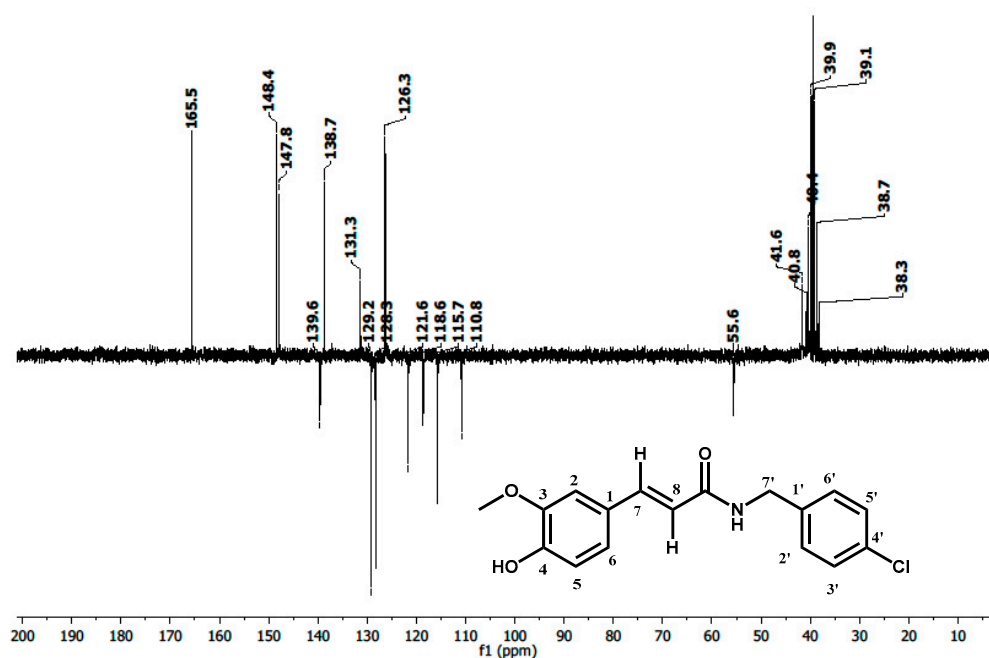

**Figure S10.**  $^{13}\text{C-APT}$  NMR spectrum of *(E)*-*N*-(4-chlorobenzyl)-3-(4-hydroxy-3-methoxyphenyl)acrylamide (3) ( $\text{DMSO-}d_6$ , 50 MHz).

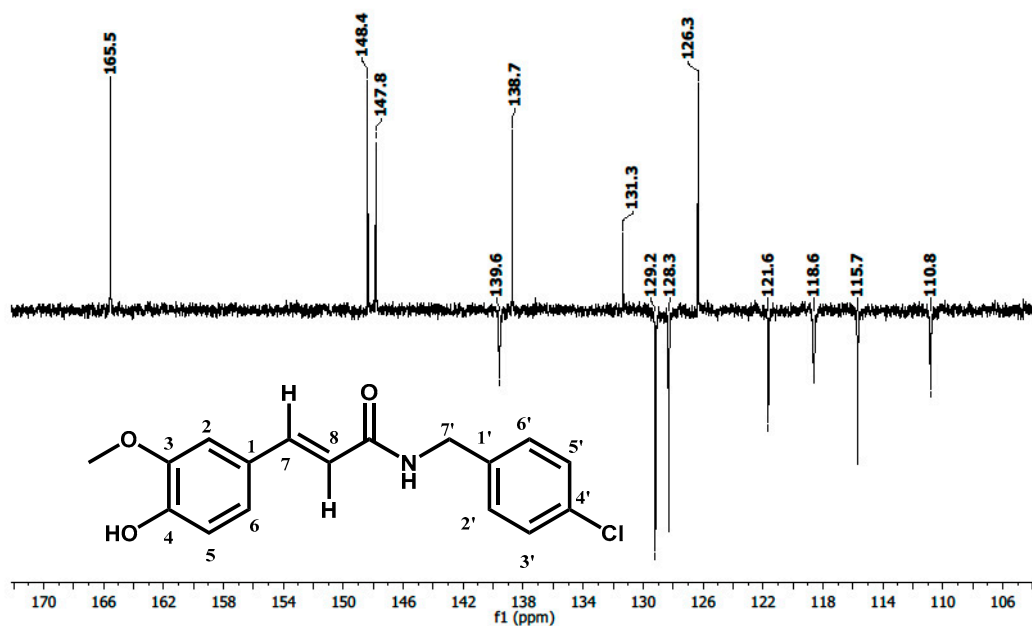

**Figure S11.** Expansion of the <sup>13</sup>C-APT NMR spectrum of (E)-N-(4-chlorobenzyl)-3-(4-hydroxy-3-methoxyphenyl)acrylamide (3) (DMSO-*d*<sub>6</sub>, 50 MHz).

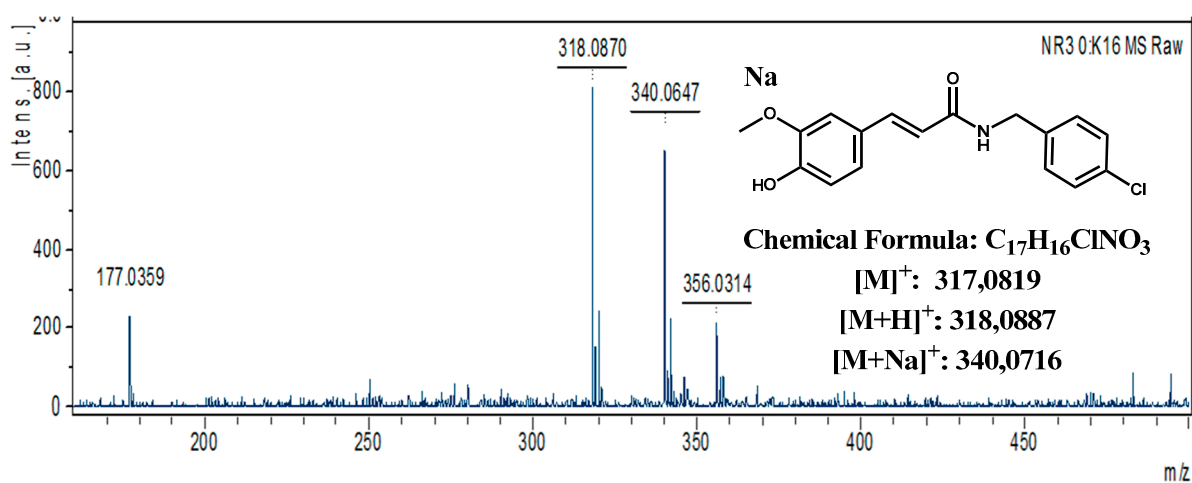

**Figure S12.** High resolution mass spectrum—MALDI of (E)-N-(4-chlorobenzyl)-3-(4-hydroxy-3-methoxyphenyl) (3).

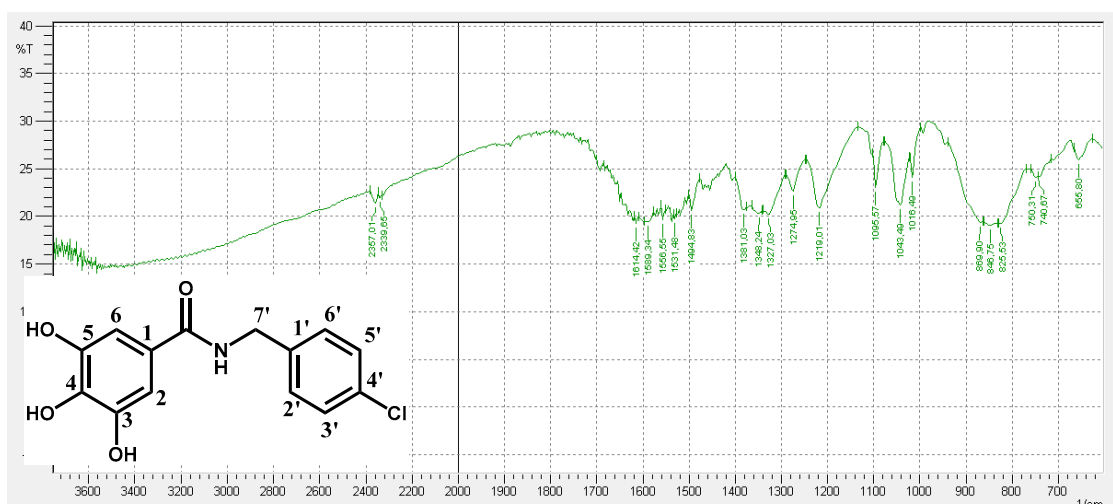

Figure S13. Infrared spectrum (KBr,  $\text{cm}^{-1}$ ) de *N*-(4-chlorobenzyl)-3,4,5-trihydroxybenzamide (14).

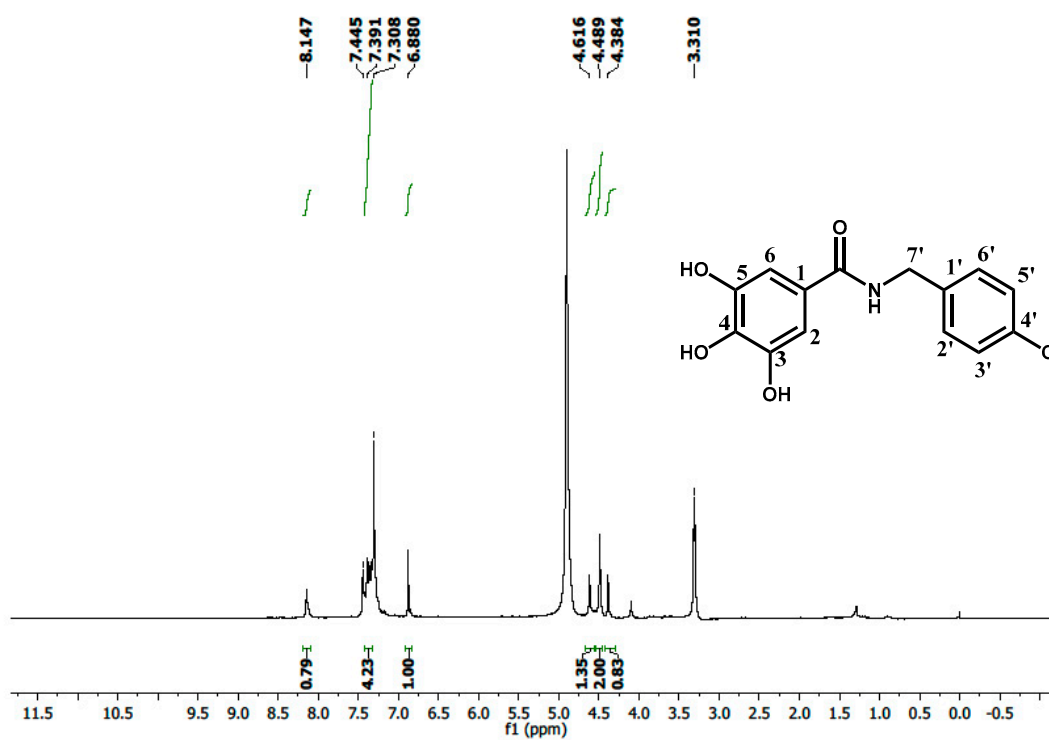

Figure S14.  $^1\text{H}$ -NMR spectrum of *N*-(4-chlorobenzyl)-3,4,5-trihydroxybenzamide (14) (MeOD, 200 MHz).

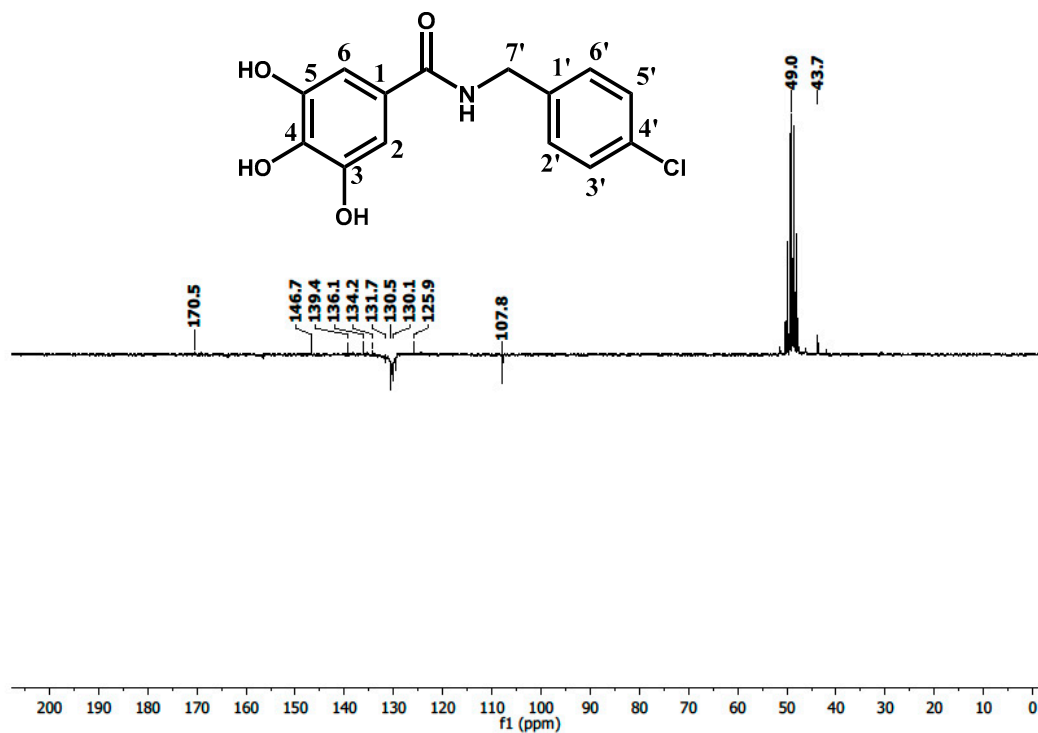

**Figure S15.** <sup>13</sup>C-APT NMR spectrum of *N*-(4-chlorobenzyl)-3,4,5-trihydroxybenzamide (14) (MeOD, 50 MHz).

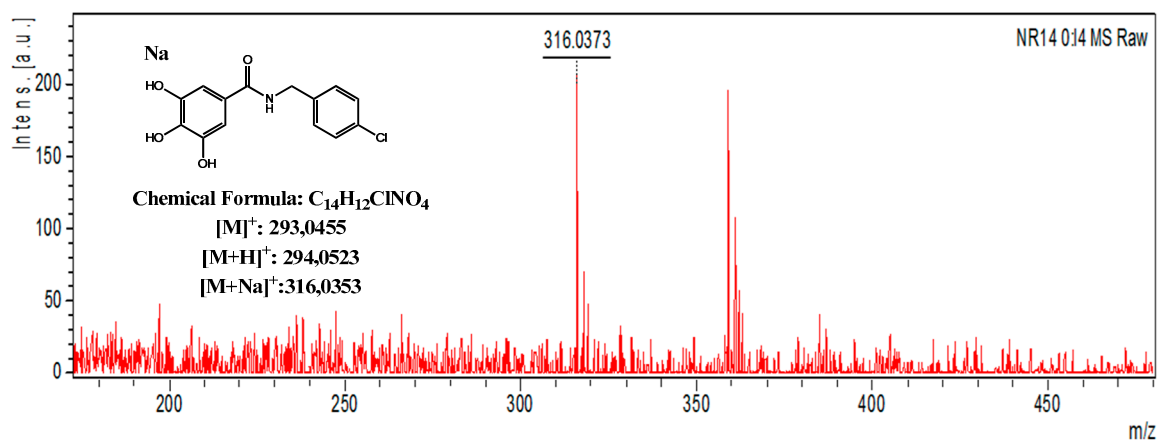

**Figure S16.** High resolution mass spectrum—MALDI of *N*-(4-chlorobenzyl)-3,4,5-trihydroxybenzamide (14).



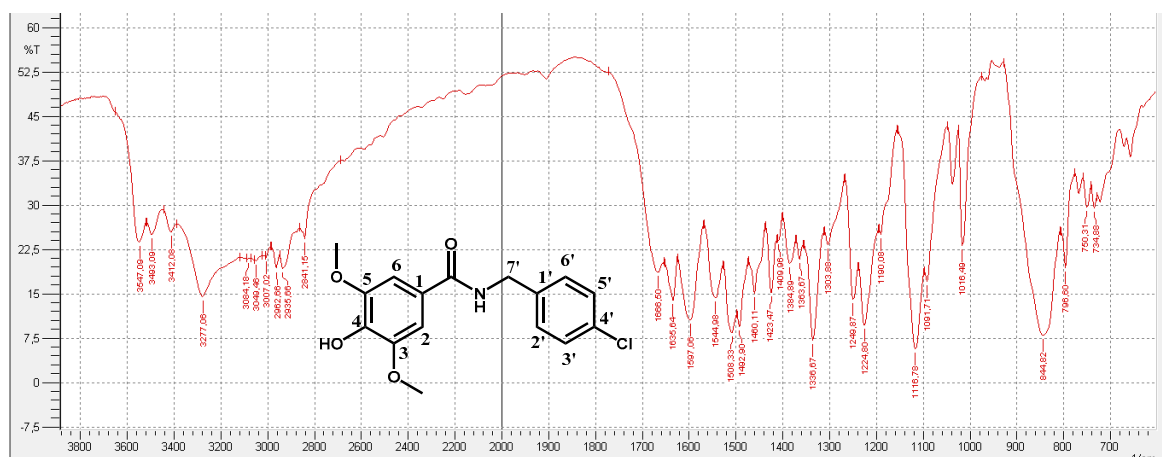

Figure S17. Infrared spectrum (KBr,  $\text{cm}^{-1}$ ) of *N*-(4-chlorobenzyl)-4-hydroxy-3,5-dimethoxybenzamide (16).

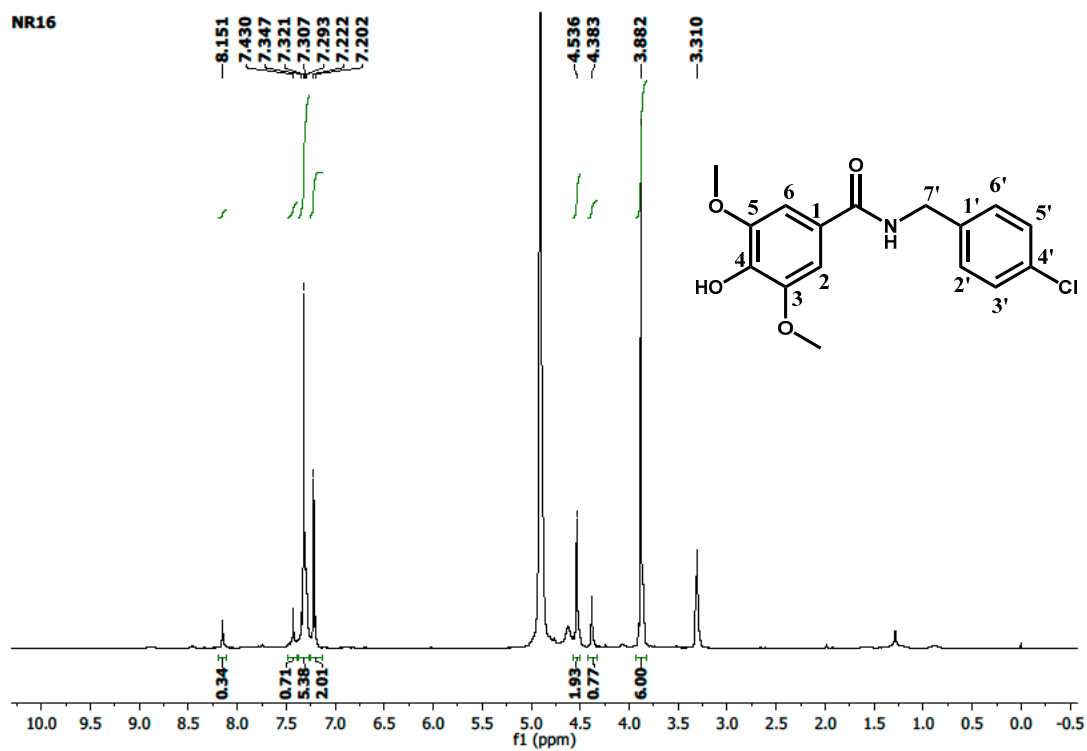

Figure S18.  $^1\text{H-NMR}$  spectrum of *N*-(4-chlorobenzyl)-4-hydroxy-3,5-dimethoxybenzamide (16) ( $\text{DMSO-}d_6$ , 200 MHz).

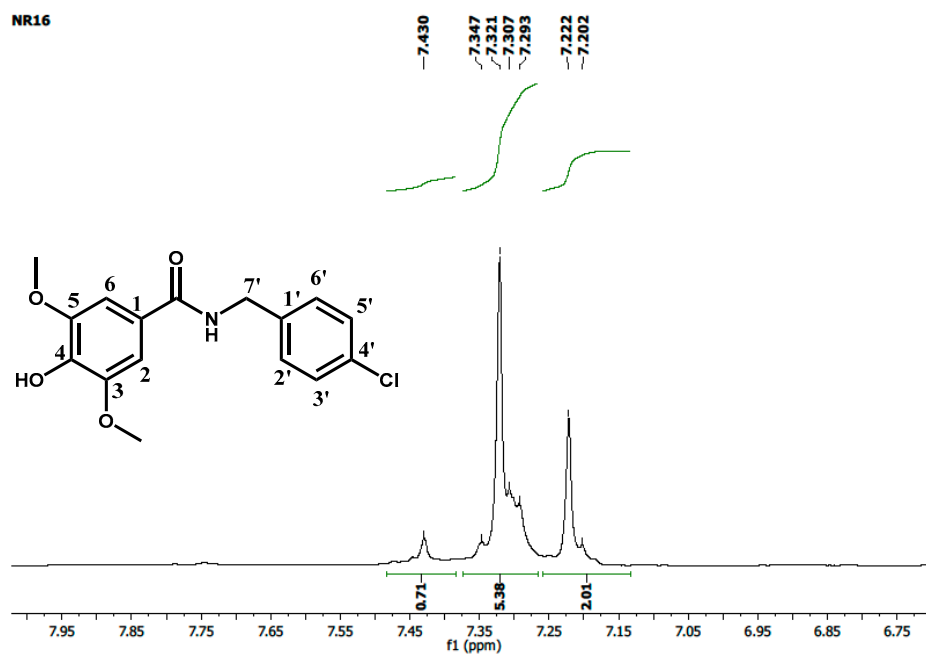

**Figure S19.** Expansion of the  $^1\text{H}$ -NMR spectrum of *N*-(4-chlorobenzyl)-4-hydroxy-3,5-dimethoxybenzamide (**16**) ( $\text{DMSO-}d_6$ , 200 MHz).

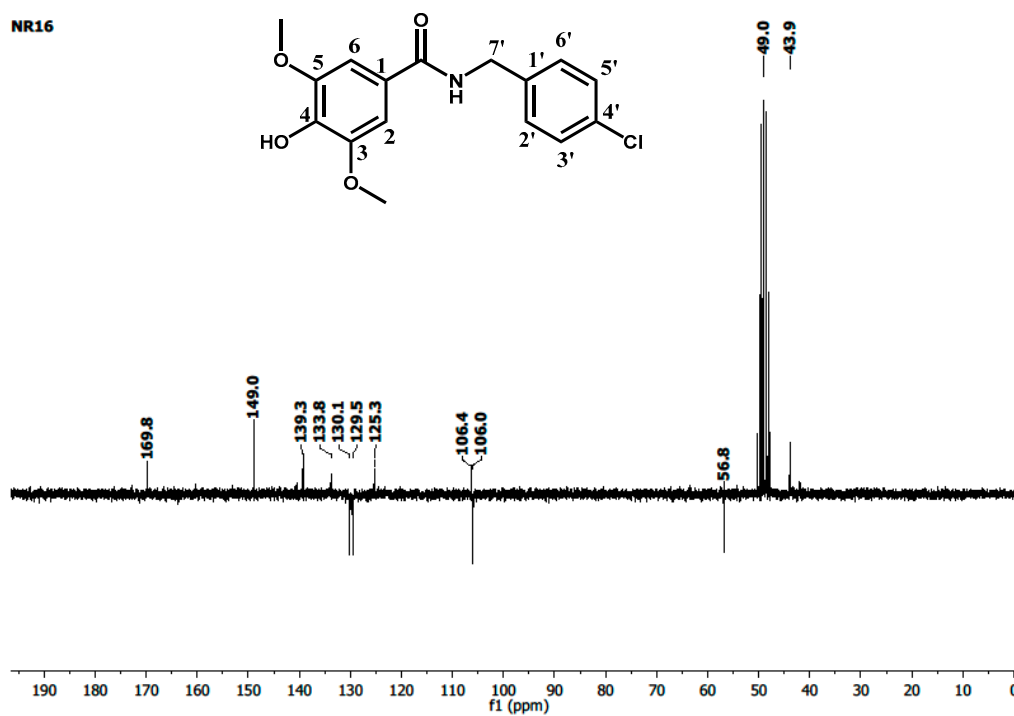

**Figure S20.**  $^{13}\text{C}$ -APT NMR spectrum of *N*-(4-chlorobenzyl)-4-hydroxy-3,5-dimethoxybenzamide (**16**) ( $\text{DMSO-}d_6$ , 50 MHz).

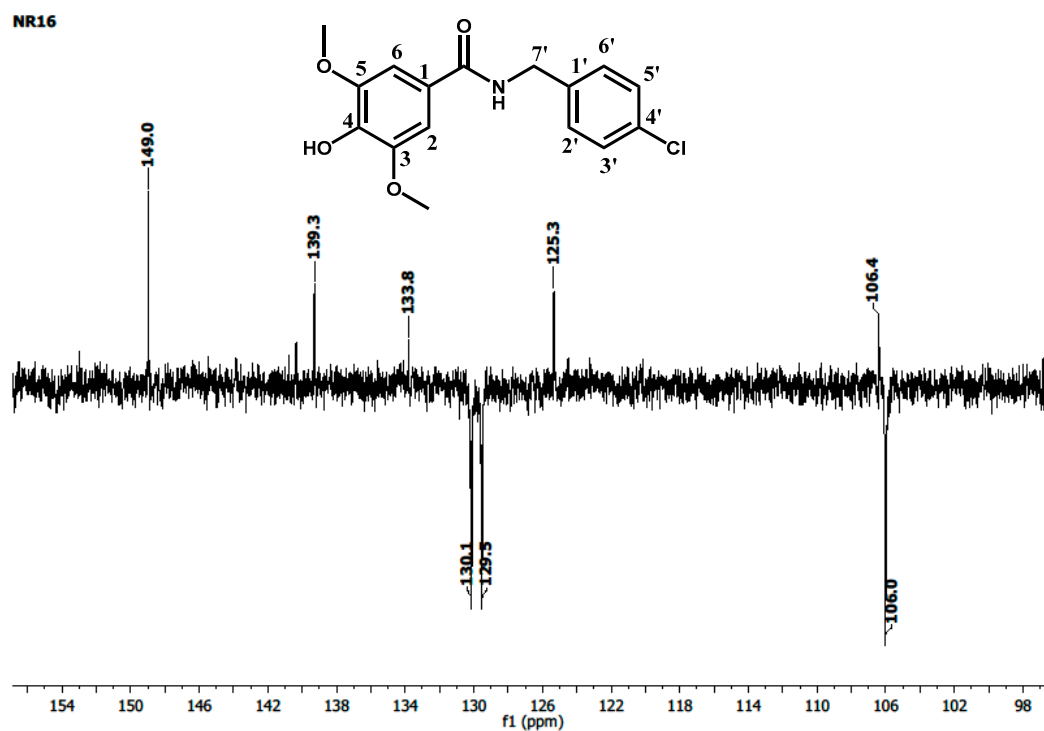

**Figure S21.** Expansion of the spectrum of  $^{13}\text{C}$ -APT NMR of *N*-(4-chlorobenzyl)-4-hydroxy-3,5-dimethoxybenzamide (16) (DMSO- $d_6$ , 50 MHz).

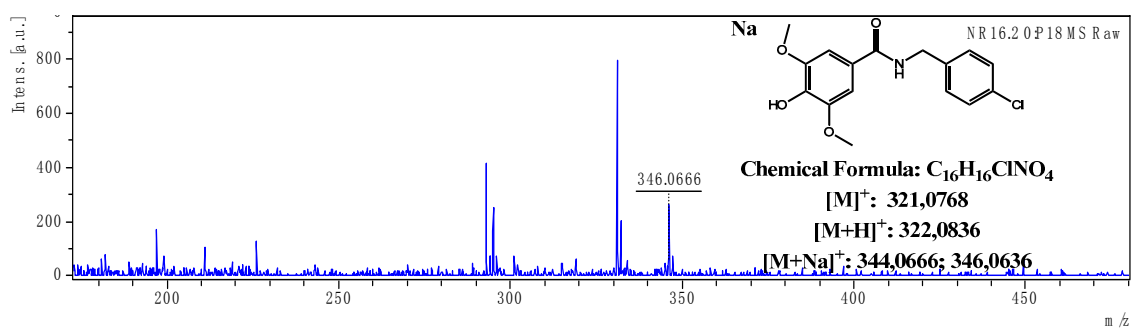

**Figure S22.** High resolution mass spectrum—MALDI of *N*-(4-chlorobenzyl)-4-hydroxy-3,5-dimethoxybenzamide (16).

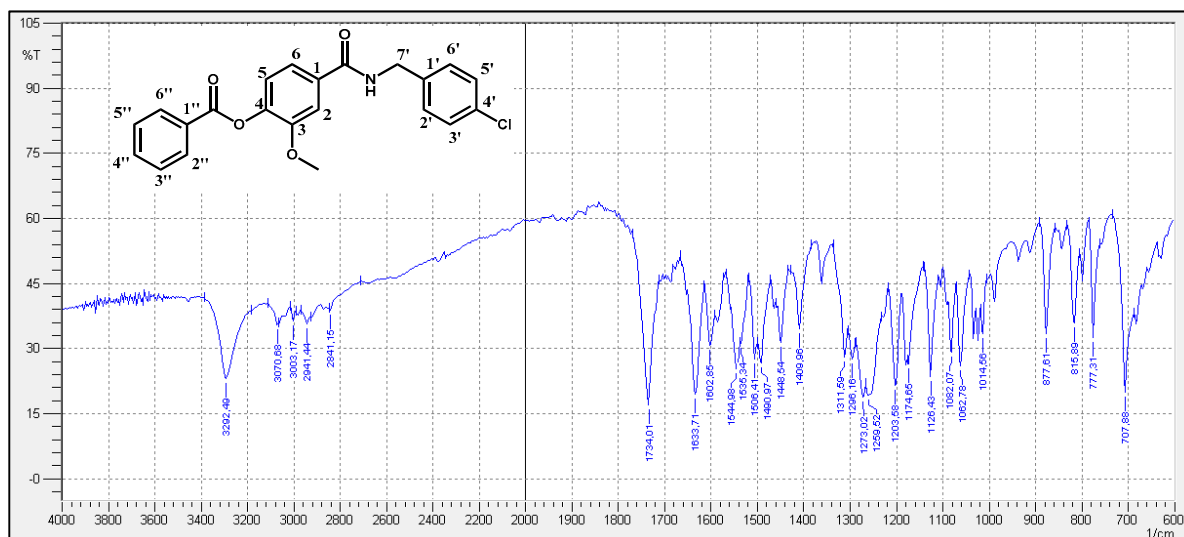

Figure S23. Infrared spectrum (KBr,  $\text{cm}^{-1}$ ) of 4-((4-chlorobenzyl) carbamoyl)-2-methoxyphenyl benzoate (23).

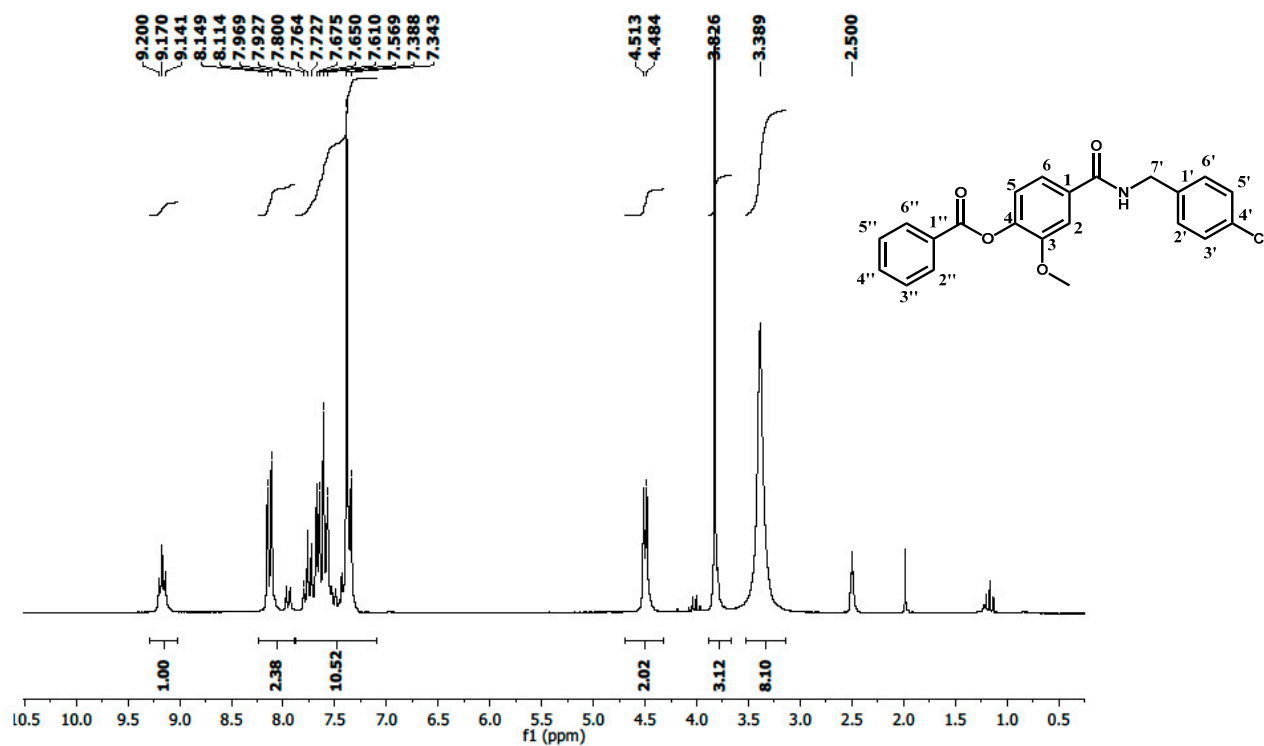

Figure S24.  $^1\text{H}$ -NMR spectrum of 4-((4-chlorobenzyl) carbamoyl)-2-methoxyphenyl benzoate (23) ( $\text{DMSO}-d_6$ , 200 MHz).

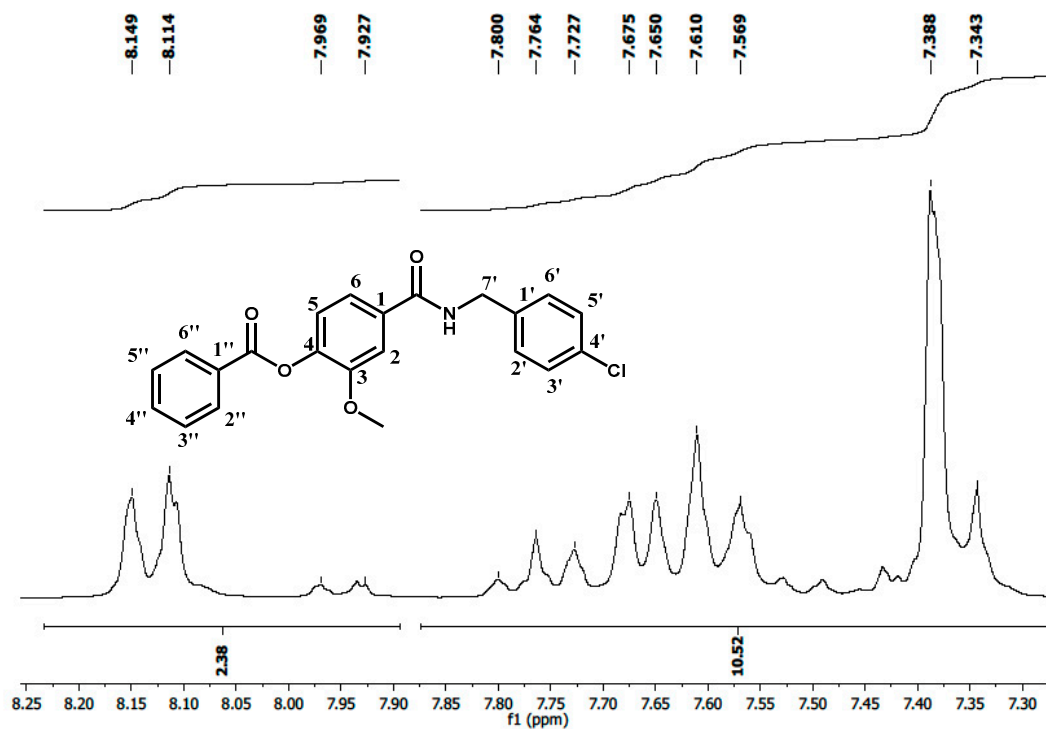

**Figure S25.** Expansion of the <sup>1</sup>H-NMR spectrum of 4-((4-chlorobenzyl) carbamoyl)-2-methoxyphenyl benzoate (23) (DMSO-*d*<sub>6</sub>, 200 MHz).

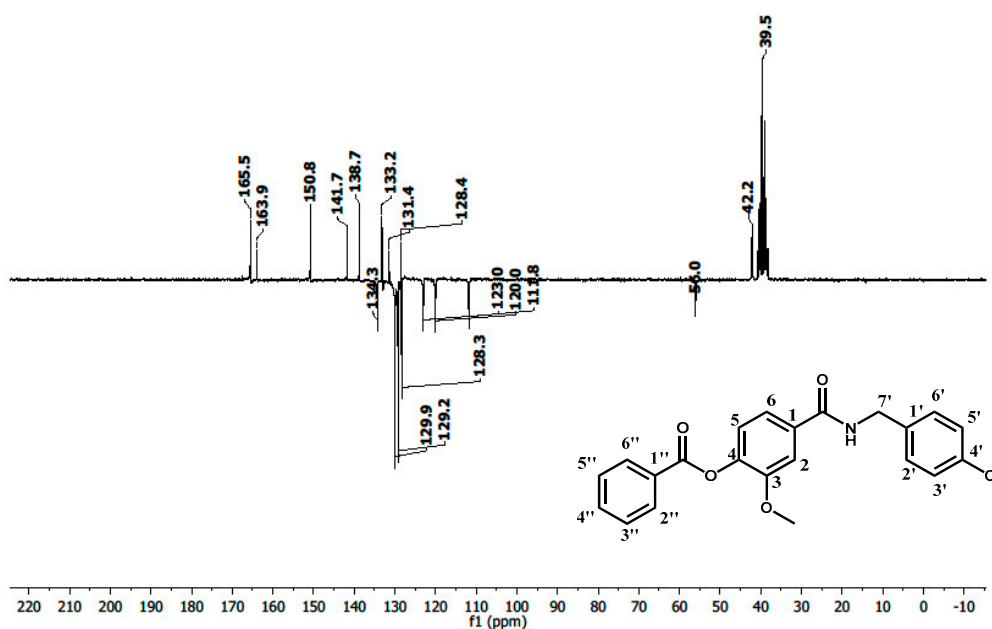

**Figure S26.** <sup>13</sup>C-APT NMR spectrum of 4-((4-chlorobenzyl) carbamoyl)-2-methoxyphenyl benzoate (23) (DMSO-*d*<sub>6</sub>, 50 MHz).

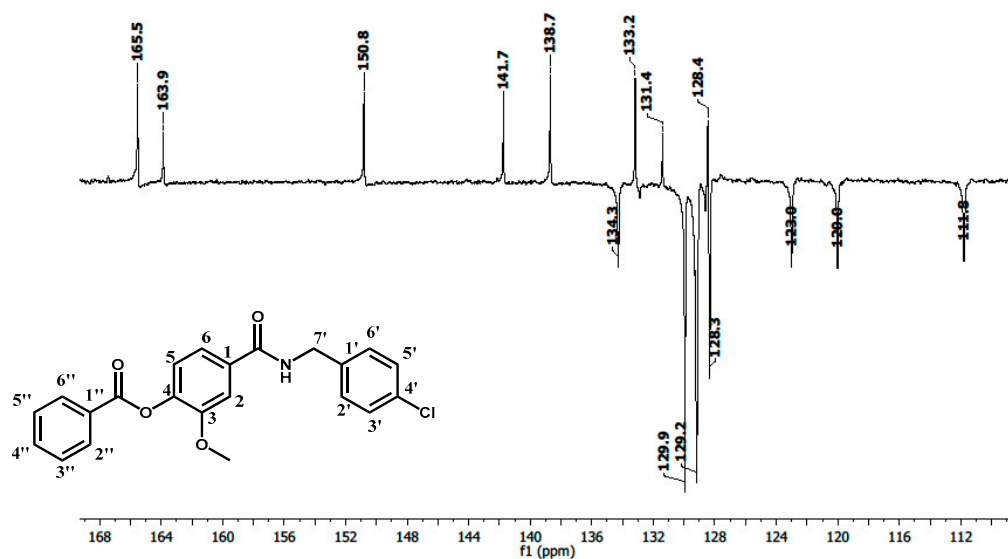

**Figure S27.** Expansion of the  $^{13}\text{C}$ -APT NMR spectrum of 4-((4-chlorobenzyl) carbamoyl)-2-methoxyphenyl benzoate (**23**) ( $\text{DMSO-}d_6$ , 50 MHz).

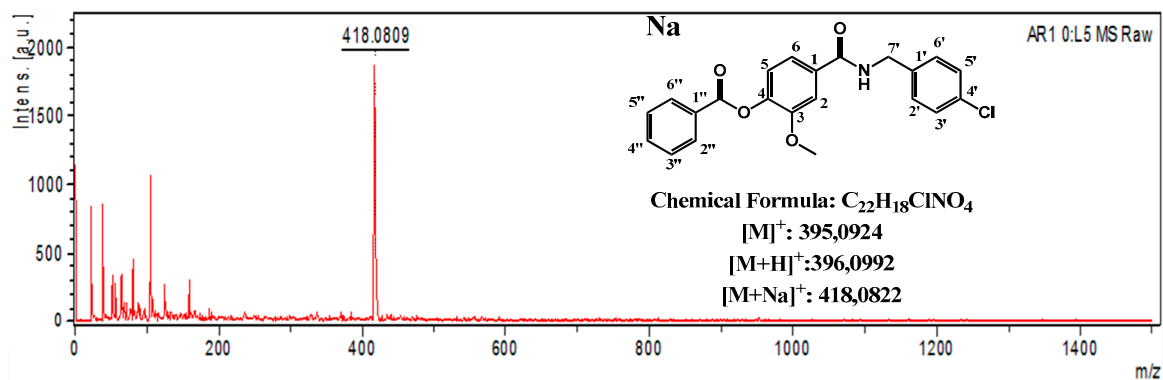

**Figure S28.** High resolution mass spectrum—MALDI of 4-((4-chlorobenzyl)carbamoyl)-2-methoxyphenyl benzoate (**23**).

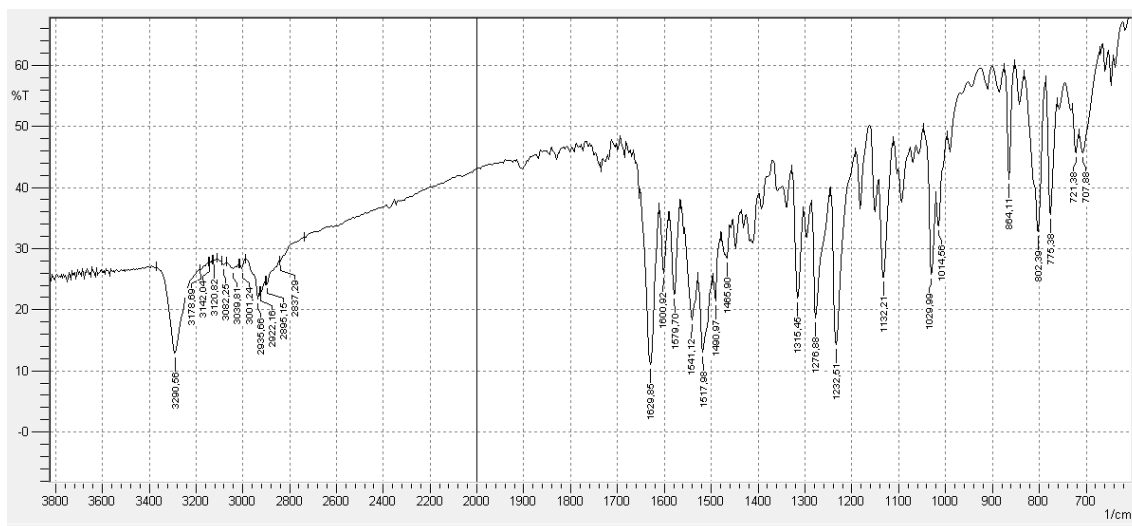

Figure S29. Infrared spectrum (KBr,  $\text{cm}^{-1}$ ) of *N*-(4-chlorobenzyl)-3-methoxy-4-(4-methylphenetoxy) (**28**).

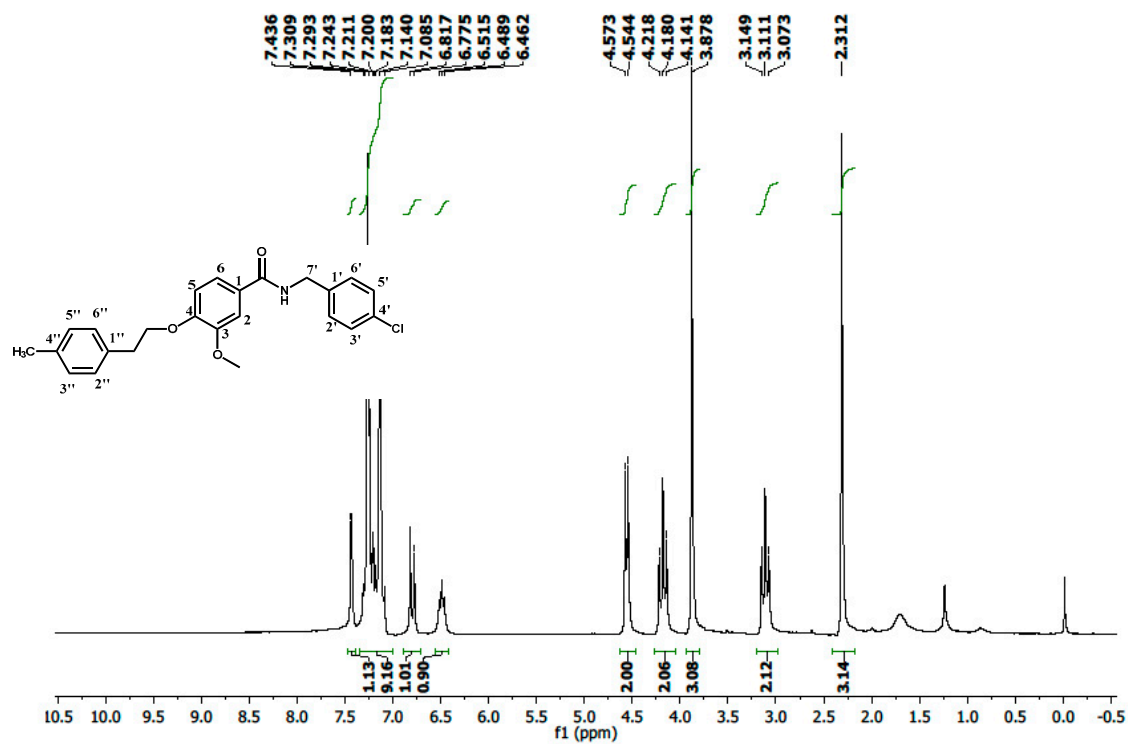

Figure S30.  $^1\text{H}$ -NMR spectrum of *N*-(4-chlorobenzyl)-3-methoxy-4-(4-methylphenetoxy) (**28**) ( $\text{CDCl}_3$ , 200 MHz).

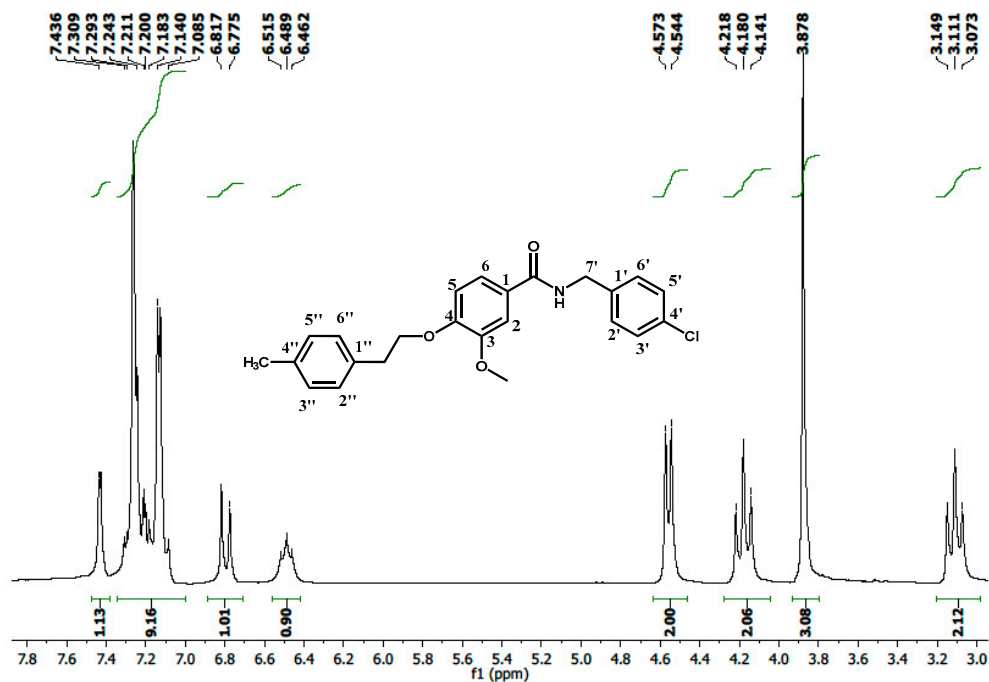

**Figure S31.** Expansion of the spectrum of  $^1\text{H}$  NMR of *N*-(4-chlorobenzyl)-3-methoxy-4-(4-methylphenetoxy) (28) ( $\text{CDCl}_3$ , 200 MHz).

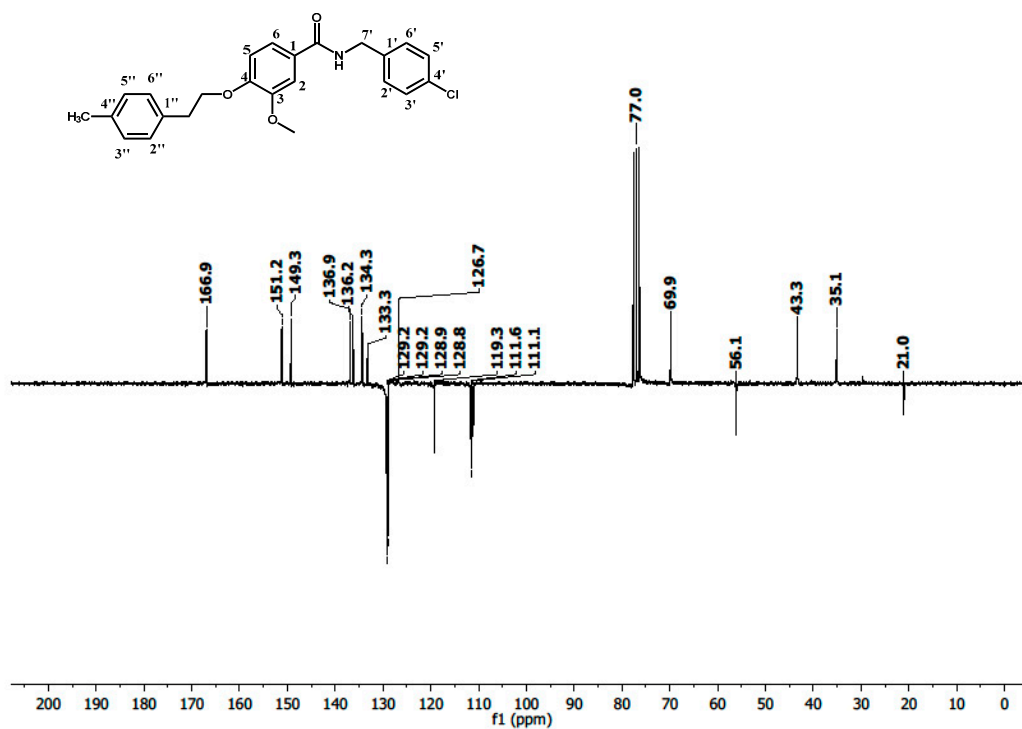

**Figure S32.**  $^{13}\text{C}$ -APT NMR spectrum of *N*-(4-chlorobenzyl)-3-methoxy-4-(4-methylphenetoxy) (28) ( $\text{CDCl}_3$ , 50 MHz).



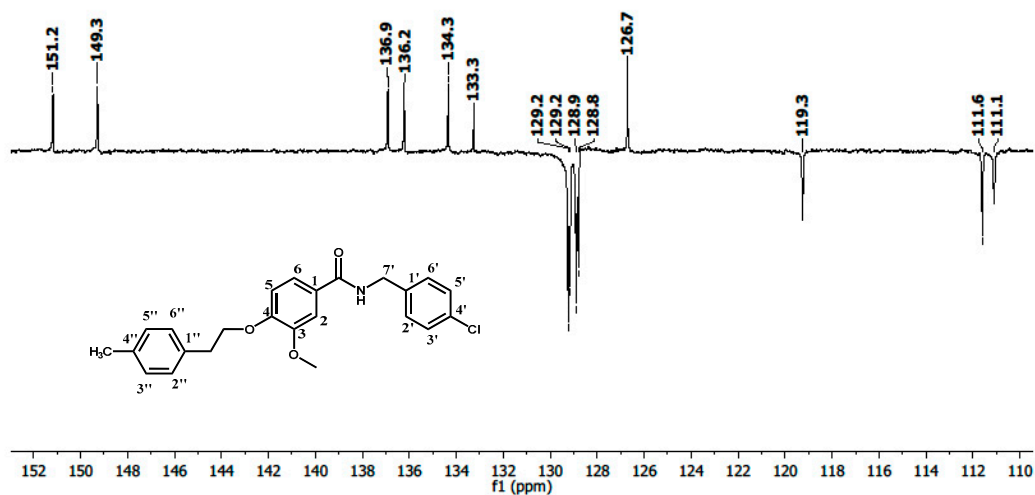

**Figure S33.** Expansion of the  $^{13}\text{C}$ -APT NMR spectrum of *N*-(4-chlorobenzyl)-3-methoxy-4-(4-methylphenetoxy) (28) ( $\text{CDCl}_3$ , 50 MHz).

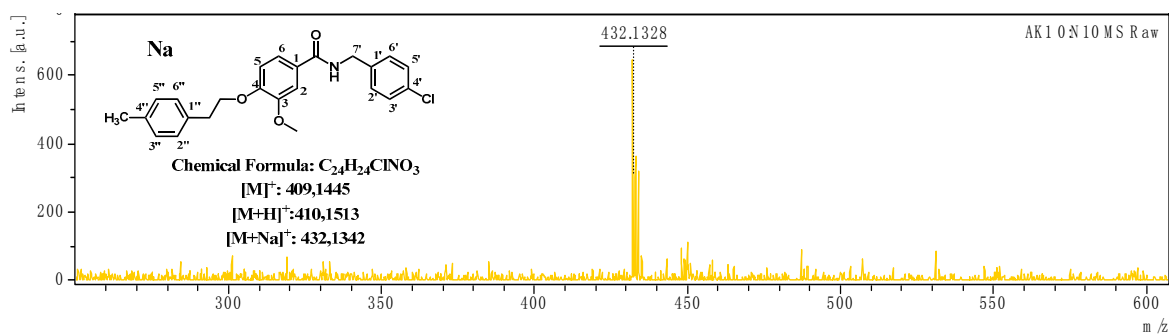

**Figure S34.** High resolution mass spectrum—MALDI of *N*-(4-chlorobenzyl)-3-methoxy-4-(4-methylphenetoxy) (28).
